# Supplementary material
Source: MDPI journal article supplement (https://www.mdpi.com/2071-1050/15/17/13249)
Supplement: s1 [file s1]

## Supporting Information

Table S1 Basic condition of plots Study area and sampling point information

| Sites     | Coordinates                 | Elevation/m               | Elevation/<br>m | Land type                          | Soil type          | Average rainfall /<br>mm | Mean<br>temperature /°C |
|-----------|-----------------------------|---------------------------|-----------------|------------------------------------|--------------------|--------------------------|-------------------------|
| Chifeng   | 119°59'21"<br>—120°05'24" E | 42°53'15"<br>—42°58'16" N | 388—436         | grassland                          | sandy soil         | 493.7                    | 7.38                    |
| Tongliao  | 120°29'43"<br>—122°01'50" E | 42°52'24"<br>—42°52'24" N | 190—370         | grassland                          | sandy<br>loam soil | 558.3                    | 8.49                    |
| Siping    | 122°01'50"<br>—124°07'60" E | 43°38'36"<br>—43°45'4" N  | 135—148         | cultivated land (corn,<br>soybean) | loam soil          | 788.7                    | 7.90                    |
| Changchun | 124°52'24"<br>—124°59'1" E  | 43°52'39"<br>—43°52'39" N | 184—217         | cultivated land (corn,<br>soybean) | silt loam<br>soil  | 756.1                    | 7.04                    |

Table S2 Results of soil physical and chemical properties\*

| Sample ID | pH   | EC<br>(μS/cm) | clay<br>(%) | silt<br>(%) | sand<br>(%) | NO <sub>3</sub> -N<br>(mg/kg) | NH <sub>4</sub> -N<br>(mg/kg) | TDP<br>(mg/kg) | WSOC<br>(mg/kg) | TN<br>(%) |
|-----------|------|---------------|-------------|-------------|-------------|-------------------------------|-------------------------------|----------------|-----------------|-----------|
| 1         | 7.57 | 28.00         | 0.85        | 1.12        | 98.03       | 3.57                          | 0.93                          | 1.54           | 21.59           | 0.02      |
| 2         | 7.54 | 46.55         | 1.13        | 5.32        | 93.55       | 3.16                          | 1.12                          | 0.58           | 36.02           | 0.03      |
| 3         | 7.50 | 54.50         | 0.88        | 7.30        | 91.81       | 3.08                          | 0.64                          | 1.17           | 32.22           | 0.05      |
| 4         | 7.08 | 31.70         | 0.50        | 3.53        | 95.97       | 3.49                          | 2.20                          | 1.97           | 23.87           | 0.03      |
| 5         | 7.16 | 31.80         | 0.02        | 2.47        | 97.51       | 3.45                          | 1.00                          | 0.74           | 20.46           | 0.03      |
| 6         | 7.16 | 18.50         | 0.19        | 2.07        | 97.73       | 2.15                          | 1.02                          | 0.78           | 11.45           | 0.02      |
| 7         | 7.56 | 128.00        | 5.34        | 32.36       | 62.30       | 9.08                          | 1.73                          | 4.18           | 83.87           | 0.11      |
| 8         | 7.29 | 219.00        | 5.33        | 33.46       | 61.21       | 15.21                         | 9.22                          | 12.75          | 192.04          | 0.12      |
| 9         | 7.68 | 156.40        | 5.82        | 31.32       | 62.86       | 13.75                         | 3.84                          | 11.34          | 107.75          | 0.12      |
| 10        | 7.83 | 140.50        | 5.54        | 43.02       | 51.43       | 10.10                         | 1.87                          | 3.59           | 83.41           | 0.07      |
| 11        | 7.57 | 170.25        | 2.26        | 30.82       | 66.92       | 12.37                         | 1.00                          | 0.94           | 47.26           | 0.05      |
| 12        | 7.62 | 182.27        | 13.99       | 59.05       | 26.96       | 27.09                         | 1.87                          | 2.91           | 101.01          | 0.18      |
| 13        | 7.70 | 203.77        | 14.50       | 58.34       | 27.16       | 33.25                         | 2.71                          | 5.33           | 118.08          | 0.19      |
| 14        | 7.62 | 185.65        | 14.07       | 57.98       | 27.95       | 36.46                         | 1.56                          | 2.34           | 88.85           | 0.17      |
| 15        | 7.72 | 186.25        | 13.14       | 58.73       | 28.13       | 27.25                         | 2.71                          | 3.96           | 109.64          | 0.19      |

\*All data are the average of two separate measurements.

Table S3 Bacteria abundance

| Sample | Actinob | Alphaprot  | Gammaprot  | Deltaproteo | Acidobact | Gemmatimo | Chlorofle | Firmicutes | Bacteroidetes | Others |
|--------|---------|------------|------------|-------------|-----------|-----------|-----------|------------|---------------|--------|
| ID     | acteria | eobacteria | eobacteria | bacteria    | eria      | nadetes   | xi        |            |               |        |
| 1      | 0.388   | 0.134      | 0.062      | 0.152       | 0.054     | 0.063     | 0.043     | 0.013      | 0.031         | 0.059  |
| 2      | 0.422   | 0.160      | 0.019      | 0.039       | 0.069     | 0.088     | 0.082     | 0.087      | 0.014         | 0.019  |
| 3      | 0.419   | 0.200      | 0.027      | 0.056       | 0.053     | 0.069     | 0.064     | 0.073      | 0.019         | 0.020  |
| 4      | 0.357   | 0.197      | 0.052      | 0.146       | 0.049     | 0.078     | 0.046     | 0.019      | 0.030         | 0.025  |
| 5      | 0.442   | 0.146      | 0.030      | 0.065       | 0.033     | 0.067     | 0.053     | 0.129      | 0.014         | 0.021  |
| 6      | 0.420   | 0.097      | 0.066      | 0.233       | 0.024     | 0.026     | 0.025     | 0.017      | 0.025         | 0.068  |
| 7      | 0.356   | 0.130      | 0.041      | 0.086       | 0.144     | 0.072     | 0.109     | 0.010      | 0.019         | 0.033  |
| 8      | 0.415   | 0.178      | 0.017      | 0.096       | 0.080     | 0.079     | 0.072     | 0.027      | 0.024         | 0.012  |
| 9      | 0.344   | 0.152      | 0.035      | 0.091       | 0.121     | 0.081     | 0.115     | 0.004      | 0.033         | 0.025  |
| 10     | 0.248   | 0.135      | 0.044      | 0.110       | 0.175     | 0.098     | 0.111     | 0.001      | 0.041         | 0.037  |
| 11     | 0.445   | 0.130      | 0.033      | 0.090       | 0.105     | 0.061     | 0.086     | 0.011      | 0.017         | 0.023  |
| 12     | 0.262   | 0.198      | 0.046      | 0.107       | 0.148     | 0.102     | 0.080     | 0.003      | 0.028         | 0.026  |
| 13     | 0.232   | 0.171      | 0.046      | 0.113       | 0.181     | 0.101     | 0.094     | 0.003      | 0.027         | 0.032  |
| 14     | 0.251   | 0.163      | 0.036      | 0.144       | 0.166     | 0.094     | 0.094     | 0.002      | 0.019         | 0.033  |
| 15     | 0.234   | 0.167      | 0.040      | 0.116       | 0.177     | 0.105     | 0.089     | 0.003      | 0.031         | 0.036  |
